# Supplementary material
Source: PubMed Central journal article supplement (PMC4566416)
Supplement: i1552-5783-56-10-5862-s01.pdf [file i1552-5783-56-10-5862-s01.pdf]

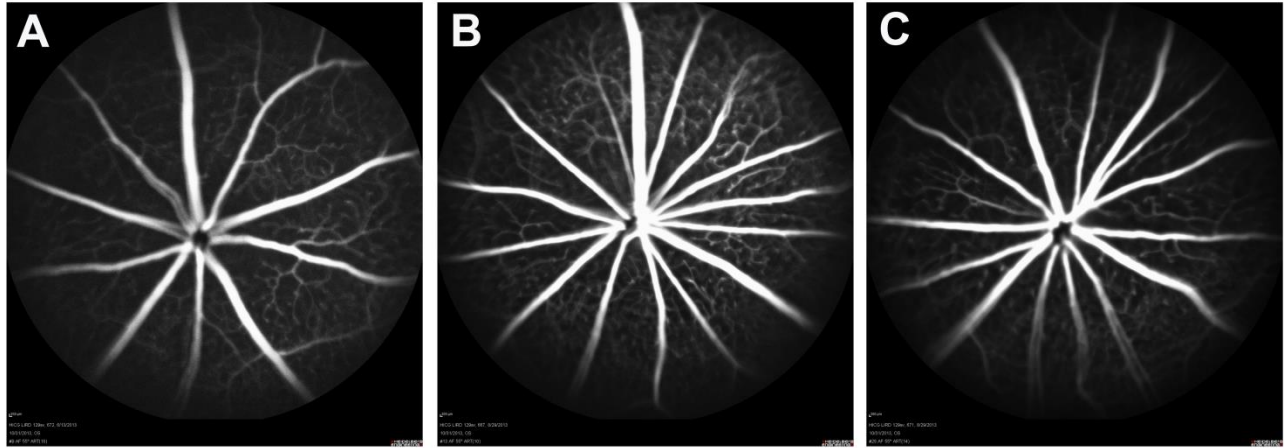

**Supplemental Figure 1:** Fluorescein angiogram fundus pictures from control (A) or LIRD (B, C) mice injected with H-800CW. Fluorescein was injected 48 hours after light damage and SLO images were captured 2 minutes after the injection. No signs of leakage were noted in the fundi of LIRD mice with H-800CW treatment.
